# Supplementary material for: Sperm Cyst “Looping”: A Developmental Novelty Enabling Extreme Male Ornament Evolution
Source: MDPI journal article supplement (doi:10.3390/cells10102762), 2021-10-15
Supplement: s1 [file s1]

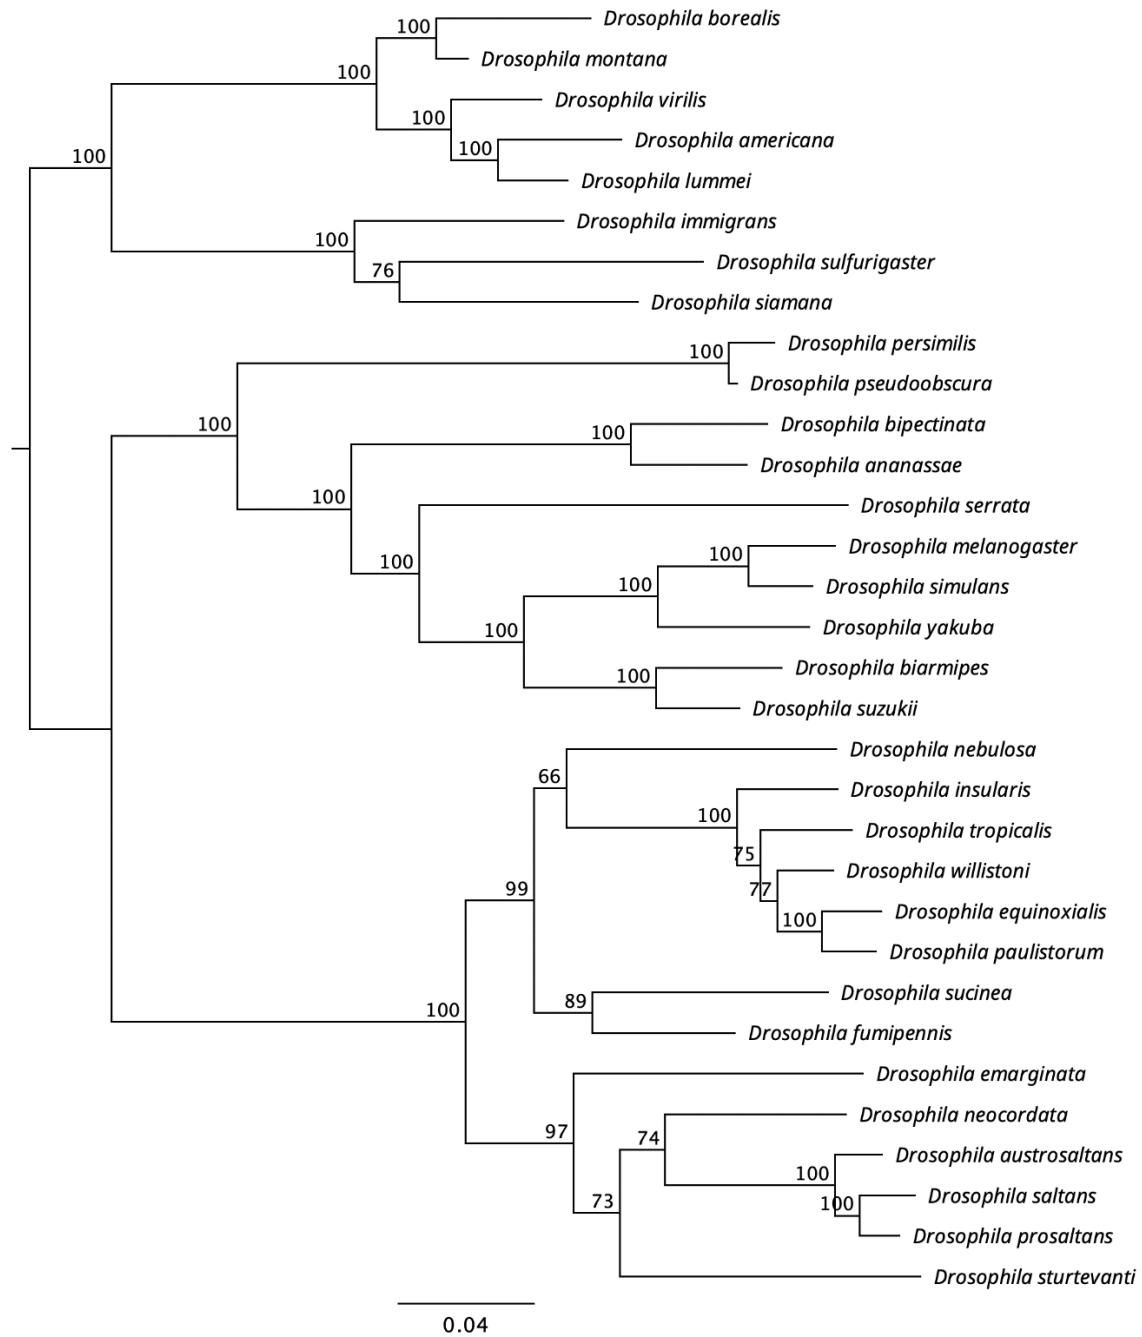

Figure S1: - Maximum likelihood (RAxML) phylogeny of our sampled taxa including a total of 32 species. Bootstrap support appears next to each node. The branch lengths indicates nucleotide substitutions per site – that is the number of changes or ‘substitutions’ divided by the length of the sequence.
